# Supplementary material
Source: Springer Nature journal article supplement (https://www.springermedizin.de/resource/supplementary/12885_2014_5198_MOESM11_ESM.pdf/9468570)
Supplement: MOESM11 [file 9468570]

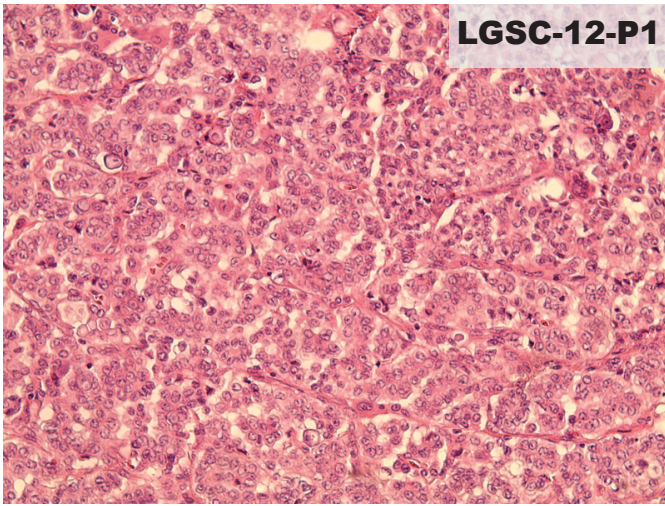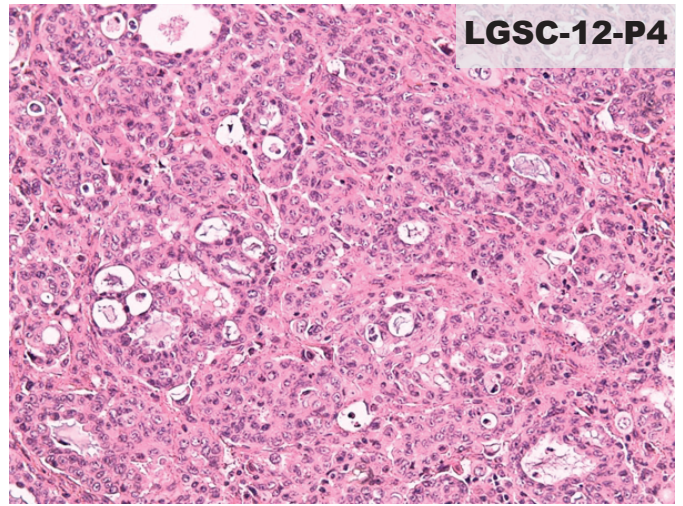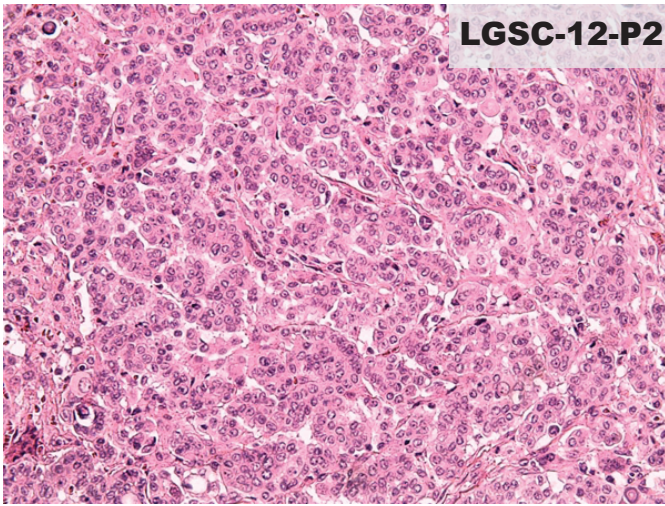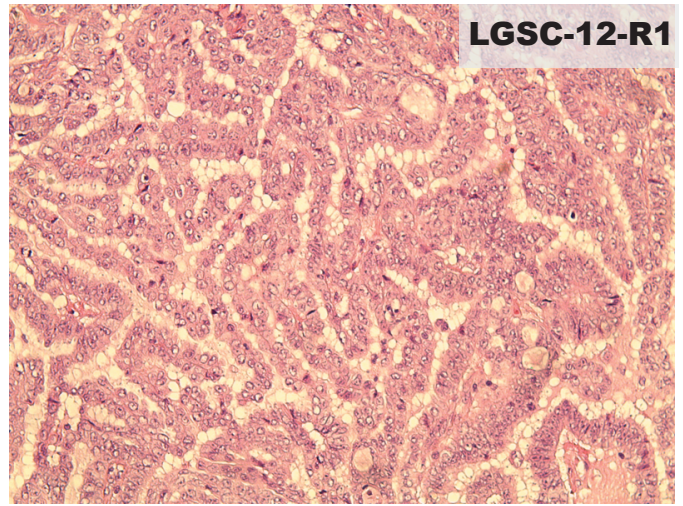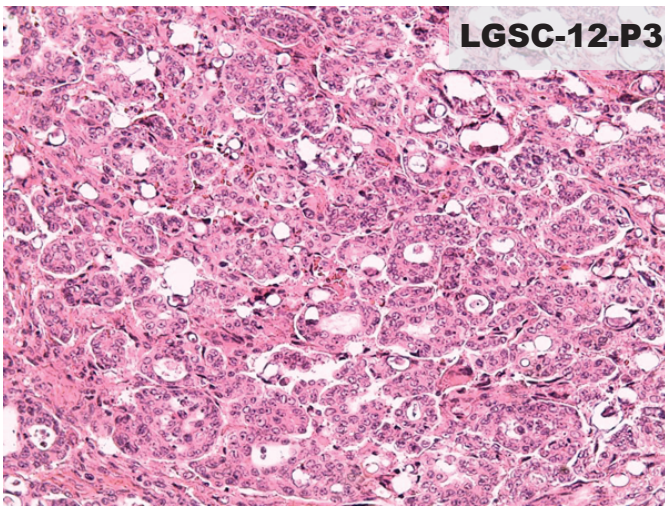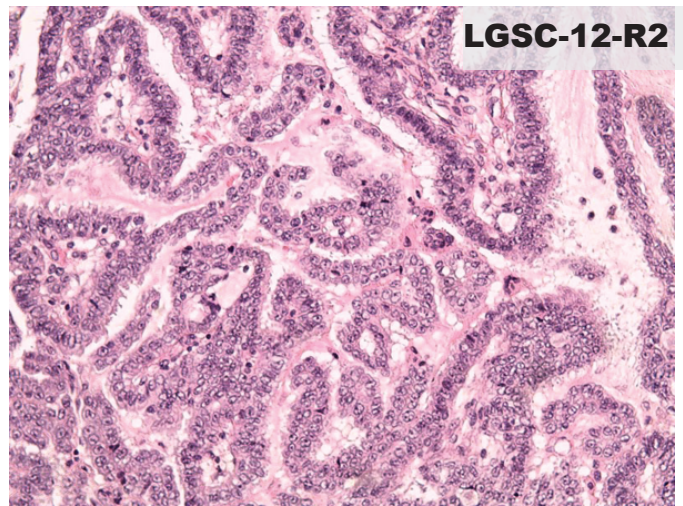

**Additional File 13. LGSC-12 Case Images.**
